# Supplementary material for: The further activation and functionalization of semicoke for CO2 capture from flue gases
Source: Royal Society of Chemistry journal article supplement (doi:10.1039/c8ra07560c), 2018-01-01
Supplement: c8ra07560c1.pdf [file c8ra07560c1.pdf]

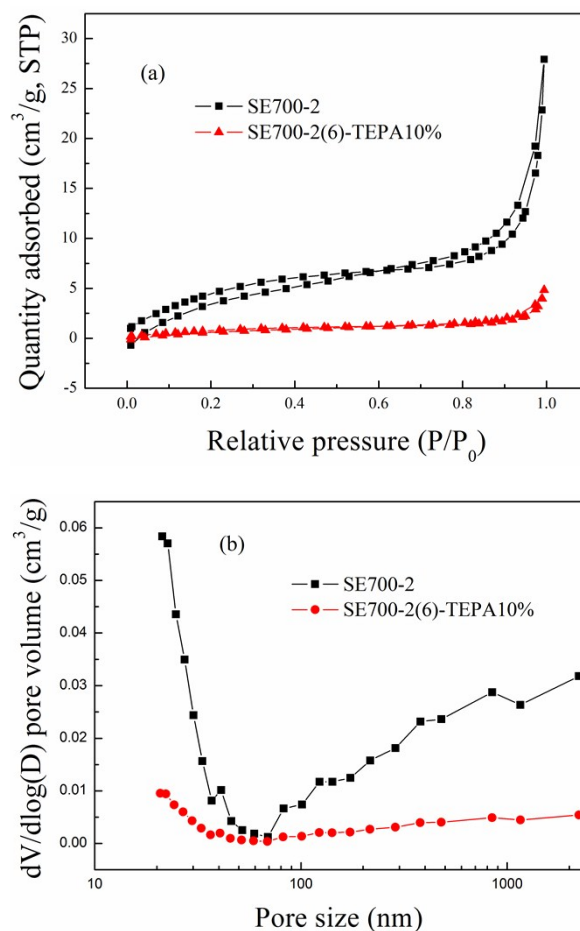

**Figure 1S.** The (a) N<sub>2</sub> adsorption isotherms and (b) pore size distribution curves for SE700-2 and SE700-2(6)-TEPA10%.

Before and after TEPA-functionalization, the activated semicoke showed a typical type-IV adsorption isotherm and H3 hysteresis loop at relatively high pressure, suggesting that crack-type mesopores existed in the activated semicoke. Moreover, the isotherm didn't reach saturation at relative pressure of 1.0, showing that macropores formed and the pore structure was irregular. As shown in Figure 1S(b), the pore size distribution for SE700-2 was wide; after 10 wt.% TEPA loading, some pores were filled, while partial pores still existed and provided room for TEPA dispersion and CO<sub>2</sub> diffusion.

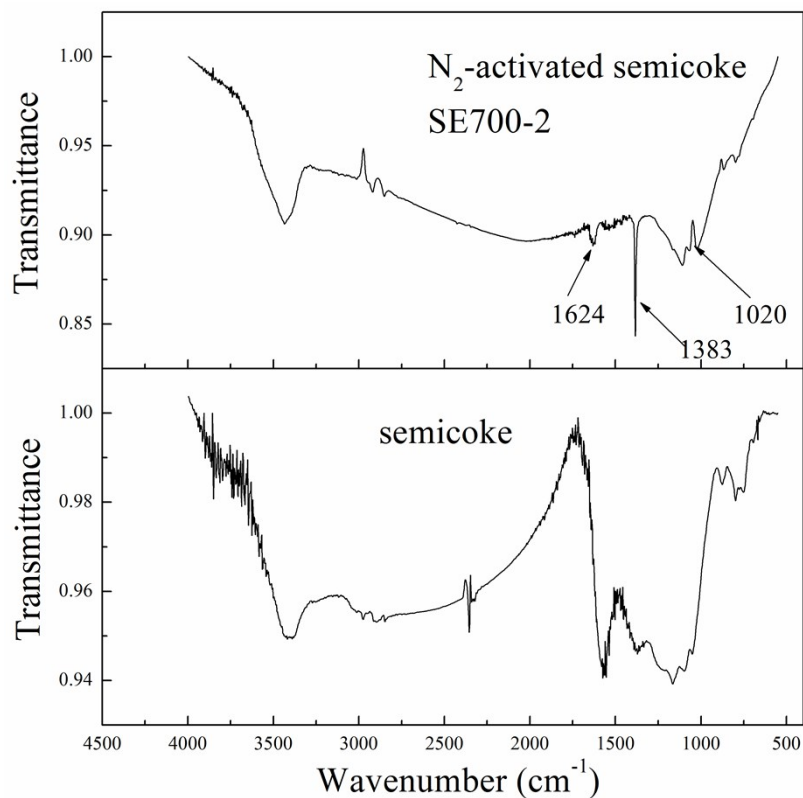

**Figure 2S.** The FT-IR spectrum for the activated semicoke of SE700-2.

Comparing with the semicoke, the peaks for SE700-2 at 1020 and 1383  $cm^{-1}$  appeared, which separately represented the asymmetric stretching vibration of C-O-C in the aliphatic and aromatic ether. The new peak centering at 1624  $cm^{-1}$  is attributed to the stretching vibration of C=C in the aromatic rings of quinone or keto-enol groups, showing that ether, quinone or keto-enol groups are constructed for the activated semicoke.
